# Supplementary material for: Osteoprotegerin, Chitinase 3-like Protein 1, and Cardiotrophin-1 as Potential Biomarkers of Obstructive Sleep Apnea in Adults—A Case-Control Study
Source: MDPI journal article supplement (doi:10.3390/ijms24032607), 2023-01-30
Supplement: s1 [file s1]

*Supplementary Material*

# **Osteoprotegerin, Chitinase 3-like Protein 1, and Cardiotrophin-1 as Potential Biomarkers of Obstructive Sleep Apnea in Adults—A Case-Control Study**

**Piotr Fiedorczuk <sup>1,\*</sup>, Ewa Olszewska <sup>1</sup>, Joanna Rogalska <sup>2</sup> and Małgorzata M. Brzóska <sup>2</sup>**

<sup>1</sup> Department of Otolaryngology, Medical University of Białystok, 15-089 Białystok, Poland

<sup>2</sup> Department of Toxicology, Medical University of Białystok, 15-089 Białystok, Poland

\* Correspondence: piotr.fiedorczuk@sd.umb.edu.pl; Tel.: +48-663-751-516

**Supplementary Material - Table S1 – Total Oxidative Status (TOS), Total Antioxidative Status (TAS), and Oxidative Stress Index (OSI) of the serum and plasma**

|                                                                                                                                                                  |     | OSA<br>group (n=52)                          | Control<br>group (n=28)                      | p-value           |
|------------------------------------------------------------------------------------------------------------------------------------------------------------------|-----|----------------------------------------------|----------------------------------------------|-------------------|
| <b>Serum</b>                                                                                                                                                     | TOS | 275.9; 19.26 - 1352<br>(IQR 153.0- 537.4)    | 389.7; 98.31 - 1037<br>(IQR 154.5- 544.4)    | 0.6565            |
|                                                                                                                                                                  | TAS | 28.28; 0.7300 - 283.9<br>(IQR 5.973 - 63.03) | 133.2; 34.87 - 345.7<br>(IQR 85.52 - 180.3)  | <b>&lt;0.0001</b> |
|                                                                                                                                                                  | OSI | 14.31; 0.4952 - 246.5<br>(IQR 5.221 - 36.94) | 2.468; 0.7322 - 13.08)<br>(IQR 1.600 - 4.874 | <b>&lt;0.0001</b> |
| <b>Plasma</b>                                                                                                                                                    | TOS | 185.5; 8.110 - 724.6.<br>(IQR 77.03 - 281.7  | 192.1; 16.35 - 678.4<br>(IQR 107.9 - 353.9)  | 0.3797            |
|                                                                                                                                                                  | TAS | 47.80; 1.100 - 226.2<br>(IQR 27.51 - 84.10)  | 115.1; 19.77 - 309.2<br>(IQR 47.50 - 205.1)  | <b>0.0005</b>     |
|                                                                                                                                                                  | OSI | 3.045; 0.2270 - 103.4<br>(IQR 1.492 - 7.173) | 1.860; 0.000 - 5.920<br>(IQR 0.8675 - 3.510) | <b>0.0074</b>     |
| Values are presented as median and minimum-maximum (Interquartile range).                                                                                        |     |                                              |                                              |                   |
| Abbreviations: OSA, Obstructive Sleep Apnea; TOS, Total Oxidative Status; TAS, Total Antioxidative Status; OSI, Oxidative Stress Index; IQR, Interquartile range |     |                                              |                                              |                   |

**Supplementary Material - Table S2 – Total Oxidative Status (TOS), Total Antioxidative Status (TAS), and Oxidative Stress Index (OSI) of the serum and plasma of Moderate and Severe OSA groups.**

|                                                                                                                                                                  |     | Control group (n=28)                      | Moderate OSA group (n=27)                 | p-value compared to the Control group | Severe OSA group (n=25)                   | p-value compared to the Control group |
|------------------------------------------------------------------------------------------------------------------------------------------------------------------|-----|-------------------------------------------|-------------------------------------------|---------------------------------------|-------------------------------------------|---------------------------------------|
| <b>Serum</b>                                                                                                                                                     | TOS | 389.7; 98.31 - 1037 (IQR 154.5- 544.4)    | 372.0; 19.26 - 989.2 (IQR 135.8 - 517.9)  | 0.6823                                | 268.6; 36.49 -1352 (IQR 160.0 - 586.0)    | 0.6113                                |
|                                                                                                                                                                  | TAS | 133.2; 34.87 - 345.7 (IQR 85.52 - 180.3)  | 19.22; 1.990 - 148.1 (IQR 5.110 - 49.99)  | <0.0001                               | 28.46; 0.7300 - 283.9 (IQR 7.115 - 72.90) | <0.0001                               |
|                                                                                                                                                                  | OSI | 2.468; 0.7322 - 13.08) (IQR 1.600 - 4.874 | 36.29; 0.6854 - 246.5 (IQR 7.496 - 20.59) | <0.0001                               | 13.97; 0.4952 - 166.0 (IRQ 6.095 - 39.74) | <0.0001                               |
| <b>Plasma</b>                                                                                                                                                    | TOS | 192.1; 16.35 - 678.4 (IQR 107.9 - 353.9)  | 195.1; 8.110 - 563.2 (IQR 96.45 - 288.5)  | 0.5542                                | 190.5; 39.53 - 724.6 (IQR 77.03 - 287.1)  | 0.4926                                |
|                                                                                                                                                                  | TAS | 115.1; 19.77 - 309.2 (IQR 47.50 - 205.1)  | 38.61; 5.770 - 226.2 (IQR 26.77 - 84.01)  | 0.0026                                | 49.26; 1.100 - 157.3 (IQR 28.10 - 114.8)  | 0.0076                                |
|                                                                                                                                                                  | OSI | 1.860; 0.000 - 5.920 (IQR 0.8675 - 3.510) | 2.851; 0.2270 - 50.89 (IQR 1.492 - 7.162) | 0.0164                                | 3.212; 0.3100 - 103.4 (IQR 1.459 - 7.076) | 0.0489                                |
| Values are presented as median and minimum-maximum (Interquartile range).                                                                                        |     |                                           |                                           |                                       |                                           |                                       |
| Abbreviations: OSA. Obstructive Sleep Apnea; TOS. Total Oxidative Status; TAS. Total Antioxidative Status; OSI. Oxidative Stress Index; IQR. Interquartile range |     |                                           |                                           |                                       |                                           |                                       |
